# Supplementary material for: Side-effect of ancillary ligand on electron transfer and photodynamics of a dinuclear valence tautomeric complex
Source: Royal Society of Chemistry journal article supplement (doi:10.1039/b801171k), 2008-01-01
Supplement: b801171k.pdf [file b801171k.pdf]

## Supporting Information

### Side-effect of ancillary ligand on electron transfer and photodynamics of dinuclear valence tautomeric complex

Bao Li,<sup>a</sup> Jun Tao,<sup>\*a</sup> Hao-Ling Sun,<sup>b</sup> Osamu Sato,<sup>\*b</sup> Rong-Bin Huang<sup>a</sup> and Lan-Sun Zheng<sup>a</sup>

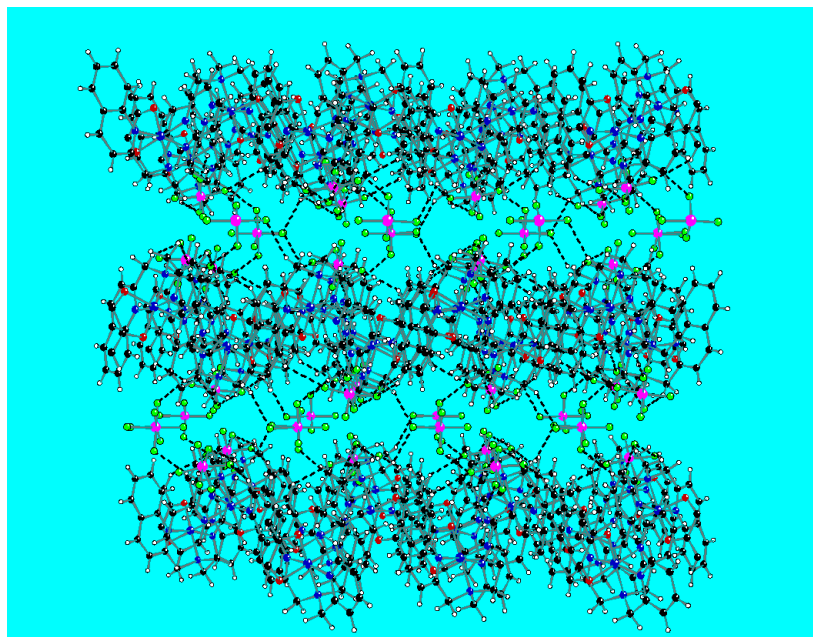

Fig. S1 Three-dimensional structure of  $1 \cdot (\text{PF}_6)_3$  featuring alternating layers of  $1^{3+}$  and counterions.

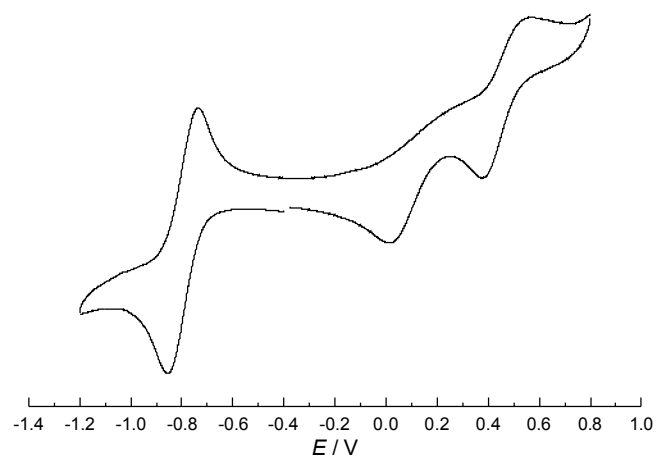

Fig. S2 CV of  $1 \cdot (\text{PF}_6)_3$ .

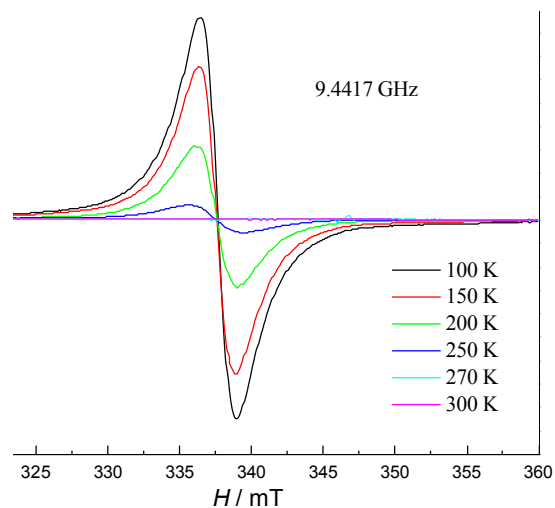

Fig. S3 ESR spectra of  $\mathbf{1} \cdot (\text{PF}_6)_3$  measured from 100 to 300 K.

Table S1. Fitting Parameters for Rate Constants  $K_{vt}(T) / (\text{s}^{-1})$  for  $\mathbf{1} \cdot (\text{PF}_6)_3$  at different temperature.

| $T / \text{K}$ | $K$    |
|----------------|--------|
| 5              | 5.5E-7 |
| 10             | 4.9E-7 |
| 15             | 2.5E-7 |
| 20             | 6.4E-7 |
| 25             | 1.3E-6 |
| 30             | 1.1E-6 |
| 35             | 1.8E-6 |
| 40             | 2.8E-6 |
| 45             | 4.9E-6 |
| 50             | 9.1E-6 |
| 55             | 1.4E-5 |
| 60             | 1.6E-5 |
| 65             | 3.2E-5 |
| 70             | 4.3E-5 |

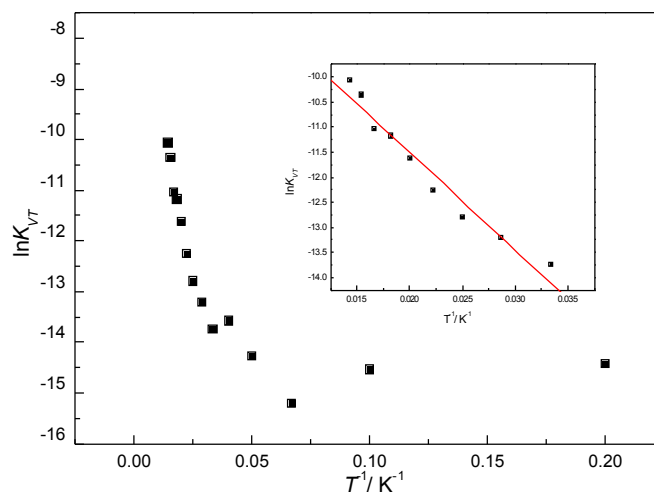

Fig. S4 Plots of  $\ln K_{VT}(T)$  versus  $1/T$  for  $1 \cdot (\text{PF}_6)_3$ , where the inset showing data from 30 K to 70 K with fitted line.

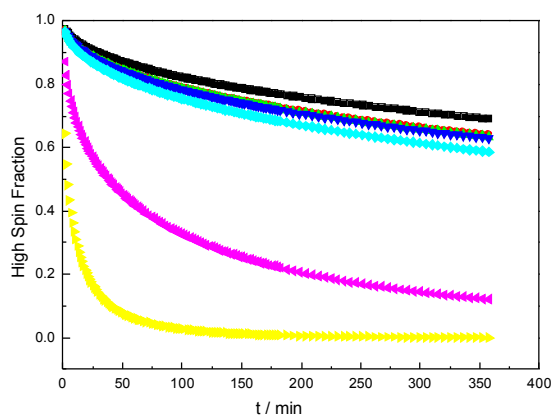

Fig. S5 Time-dependent VT relaxation of the *hs* molar fraction for  $[\{\text{Co}(\text{tpa})\}_2(\text{dhbq})] \cdot (\text{PF}_6)_3$  at temperature: 5K, 10K, 15K, 20K, 25K, 30K, 35K.

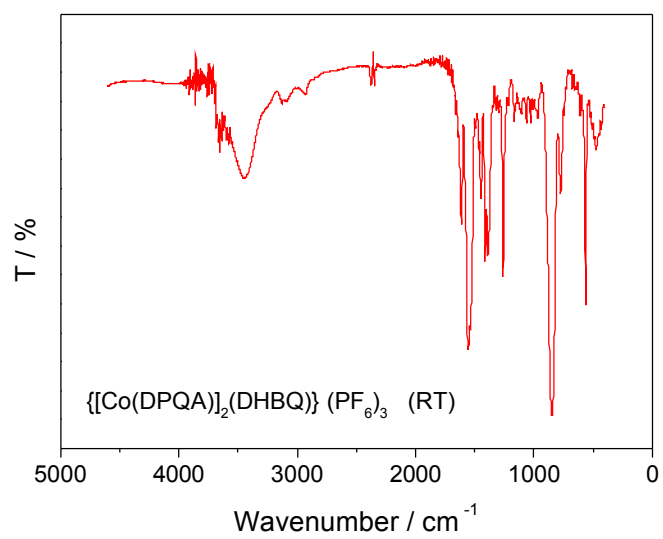

Fig. S6 IR spectra of  $\mathbf{1} \cdot (\text{PF}_6)_3$  at room temperature.
